# Supplementary material for: Downregulation of exosomal miR-7-5p promotes breast cancer migration and invasion by targeting RYK and participating in the atypical WNT signalling pathway
Source: PubMed Central journal article supplement (PMC9549651; doi:10.1186/s11658-022-00393-x), 2022-10-09

## Original Western Blot for exosome characterization

**Alix**

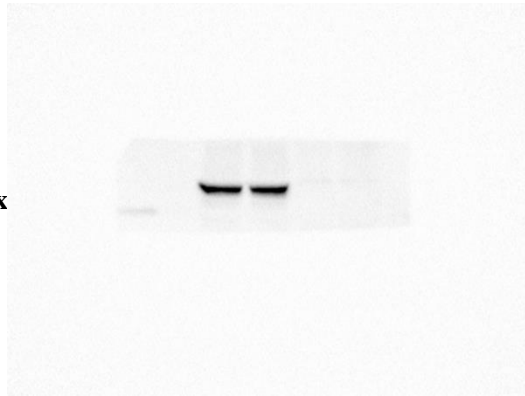

**CD63**

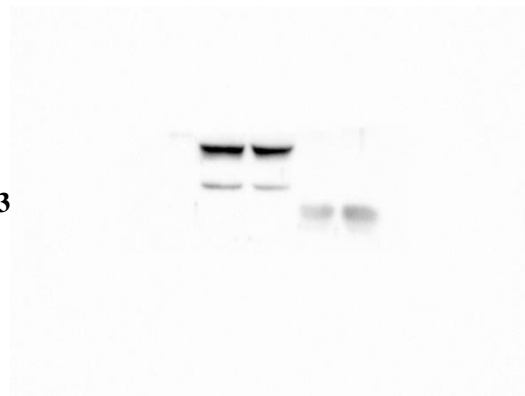

**TSG101**

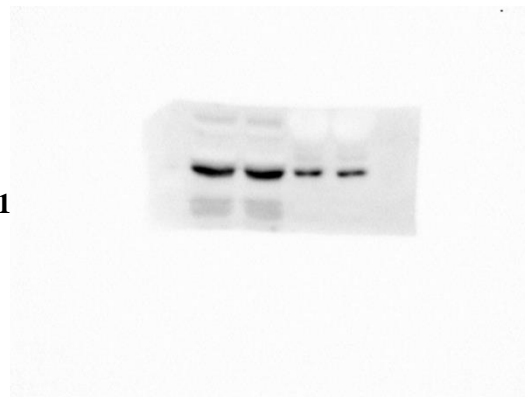

## Original Western Blot of RYK expression

**RYK**

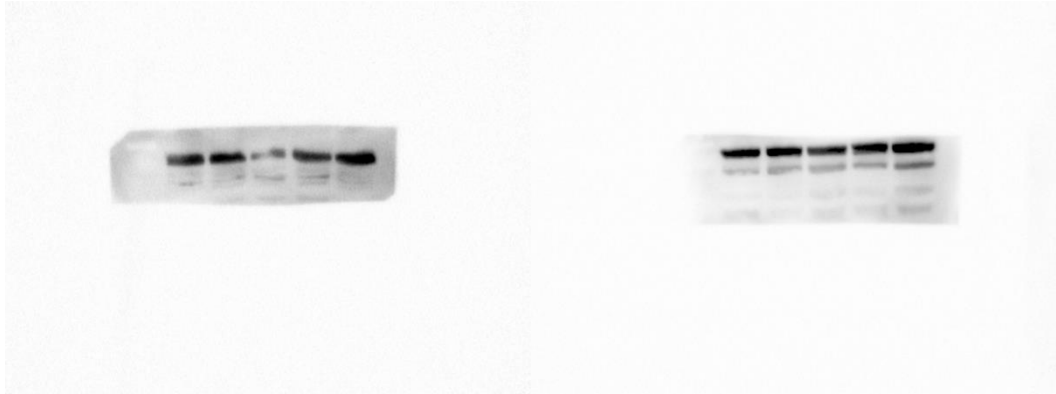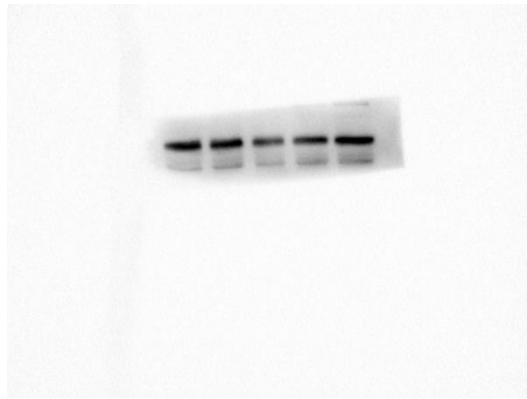

**$\beta$ -actin**

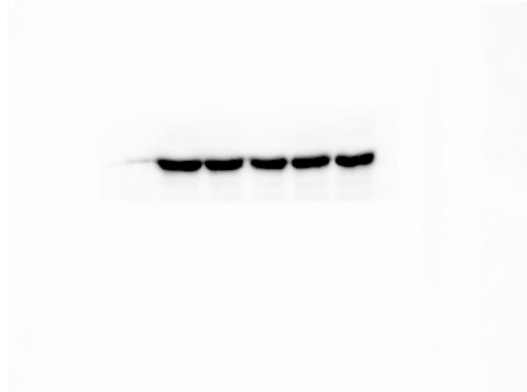

## Original Western Blot of EMT-related protein expression

**E-cadherin**

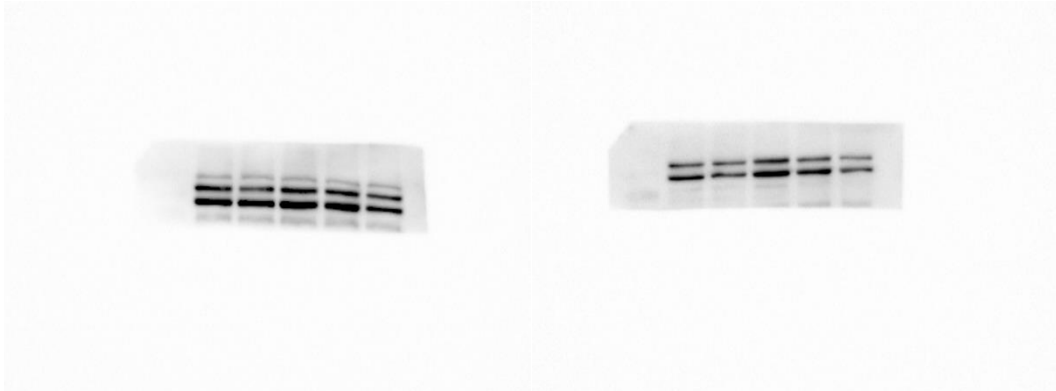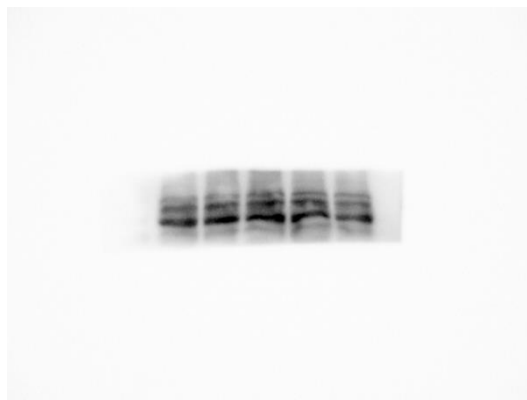

**N-cadherin**

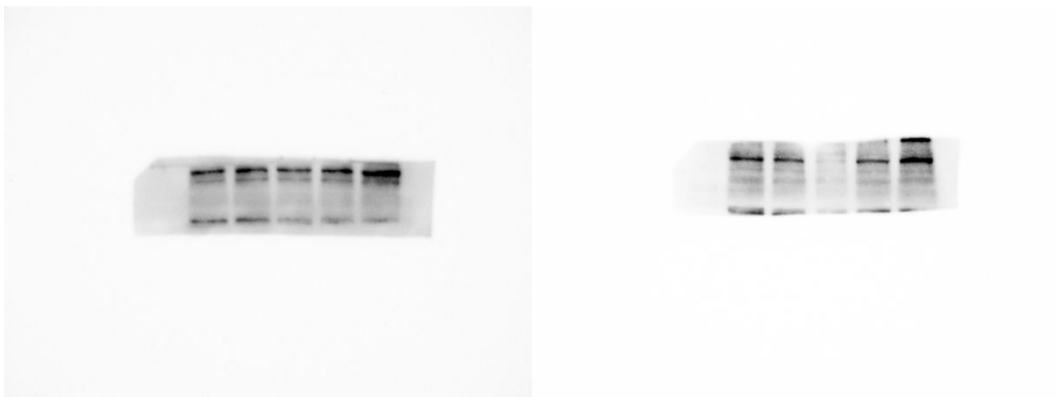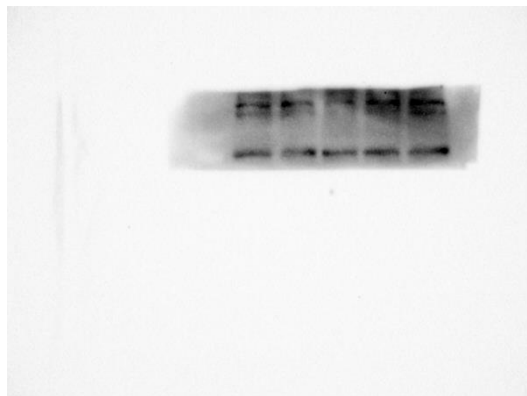

**$\beta$ -actin**

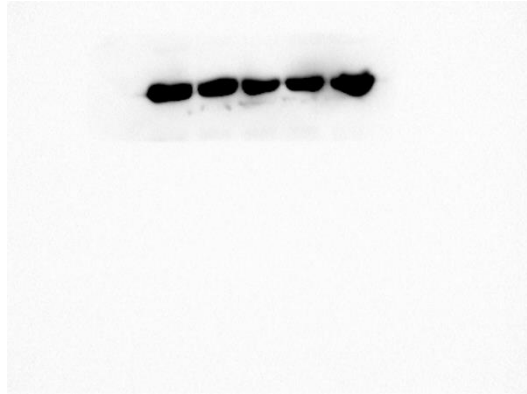

## Original Western Blot of pathway-associated protein expression

### Phosphorylated JNK (p-JNK)

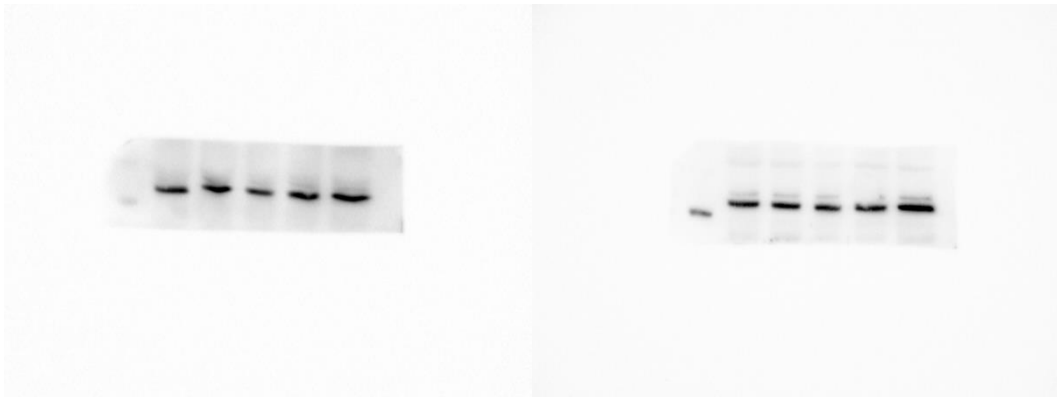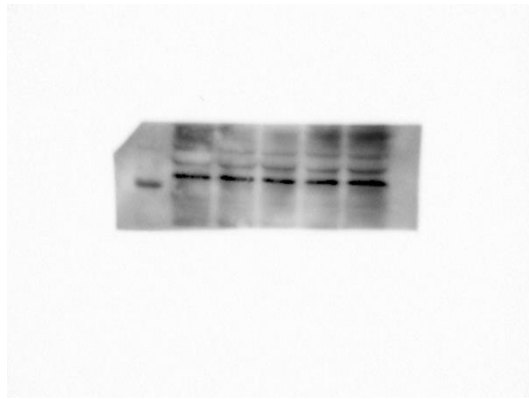

### Phosphorylated c-Jun (p-c-Jun)

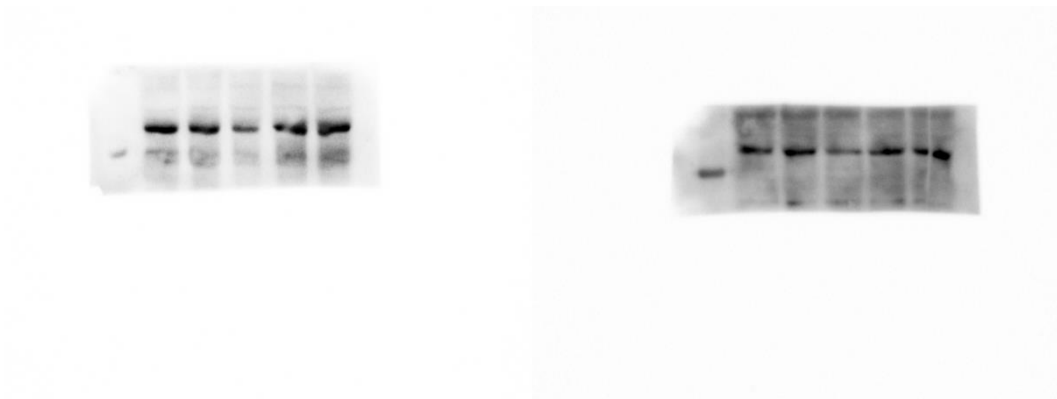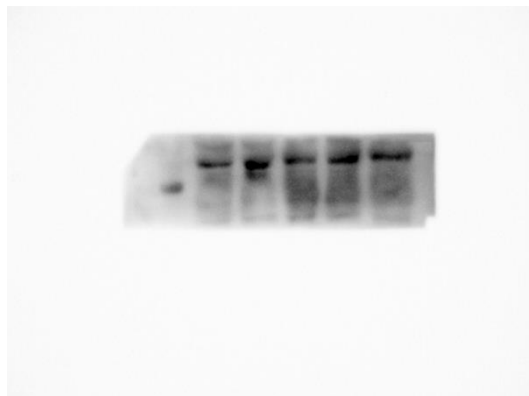

**ZEB1**

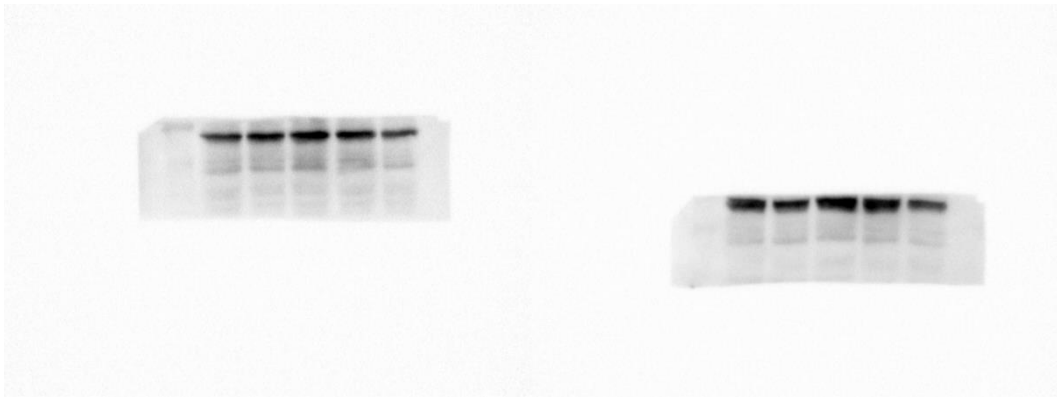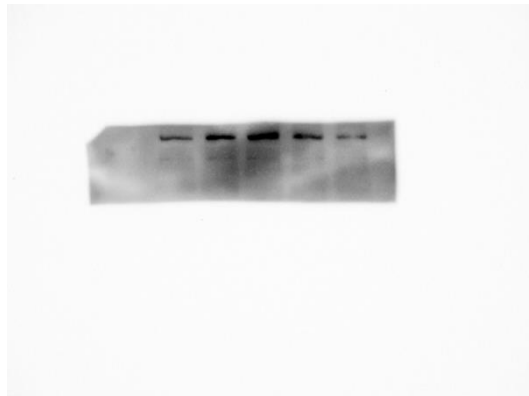

**$\beta$ -actin**

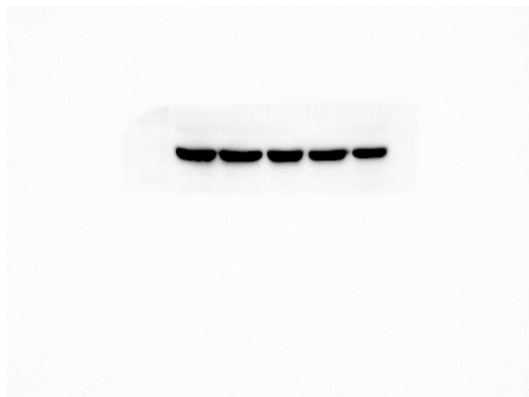

Supplement: 11658_2022_393_MOESM2_ESM.pdf [file 11658_2022_393_MOESM2_ESM.pdf]
